# Supplementary material
Source: ML conference proceedings conference paper supplement (https://openreview.net/forum?id=qqU8WPw44f)
Supplement: supplementary_material [file attachment]

---

# CURE4Rec: A Benchmark for Recommendation Unlearning with Deeper Influence

---

Chaochao Chen<sup>1</sup>, Jiaming Zhang<sup>1</sup>, Yizhao Zhang<sup>1</sup>, Li Zhang<sup>1</sup>, Lingjuan Lyu<sup>2</sup>,  
Yuyuan Li<sup>3,1</sup>, Biao Gong<sup>3</sup>, Chenggang Yan<sup>3</sup>  
<sup>1</sup>Zhejiang University, <sup>2</sup>Sony AI, <sup>3</sup>Hangzhou Dianzi University

{zjuccc, 22321350, 22221337}@zju.edu.cn, zhangliz180@gmail.com, lingjuan.lv@sony.com  
y2li@hdu.edu.cn, a.biao.gong@gmail.com, cgyan@hdu.edu.cn

## Abstract

1 With increasing privacy concerns in artificial intelligence, regulations have man-  
2 dated the *right to be forgotten*, granting individuals the right to withdraw their  
3 data from models. Machine unlearning has emerged as a potential solution to  
4 enable selective forgetting in models, particularly in recommender systems where  
5 historical data contains sensitive user information. Despite recent advances in  
6 recommendation unlearning, evaluating unlearning methods comprehensively re-  
7 mains challenging due to the absence of a unified evaluation framework and  
8 overlooked aspects of deeper influence, e.g., fairness. To address these gaps,  
9 we propose CURE4Rec, the first comprehensive benchmark for recommendation  
10 unlearning evaluation. CURE4Rec covers four aspects, i.e., unlearning Com-  
11 pleteness, recommendation Utility, unleaRning efficiency, and recommendation  
12 fairnEss, under three data selection strategies, i.e., core data, edge data, and random  
13 data. Specifically, we consider the deeper influence of unlearning on recom-  
14 mendation fairness and robustness towards data with varying impact levels. We  
15 construct multiple datasets with CURE4Rec evaluation and conduct extensive  
16 experiments on existing recommendation unlearning methods. Our code is released  
17 at <https://github.com/xiye71ai/CURE4Rec>.

## 18 1 Introduction

19 Over the past few years, growing concerns over information abundance and data leakage have  
20 intensified the focus on privacy preservation within artificial intelligence. Regulations such as  
21 the General Data Protection Regulation (GDPR) (Union, 2018), the California Consumer Privacy  
22 Act (Pardau, 2018) and the Delete Act (Information, 2023) grant individuals the *right to be forgotten*,  
23 requiring the deletion of personal data used in information systems. Nowadays, the ubiquitous  
24 application of machine learning models in information systems poses potential risks for memorizing  
25 training data (Fredrikson et al., 2015). Consequently, the aforementioned regulations also require  
26 forgetting the associated data memory within the trained models, giving rise to the concept of  
27 machine unlearning. Recently, machine unlearning has gained increasing popularity in computer  
28 vision (Bourtoule et al., 2021; Gupta et al., 2021), natural language processing (Chen & Yang, 2023;  
29 Eldan & Russinovich, 2023), and recommender systems (Chen et al., 2022; Li et al., 2023a,b). As  
30 recommender systems typically rely on historical interaction data to extract user preferences, the  
31 recommendation model inherently contains sensitive user information. Therefore, there is a crucial

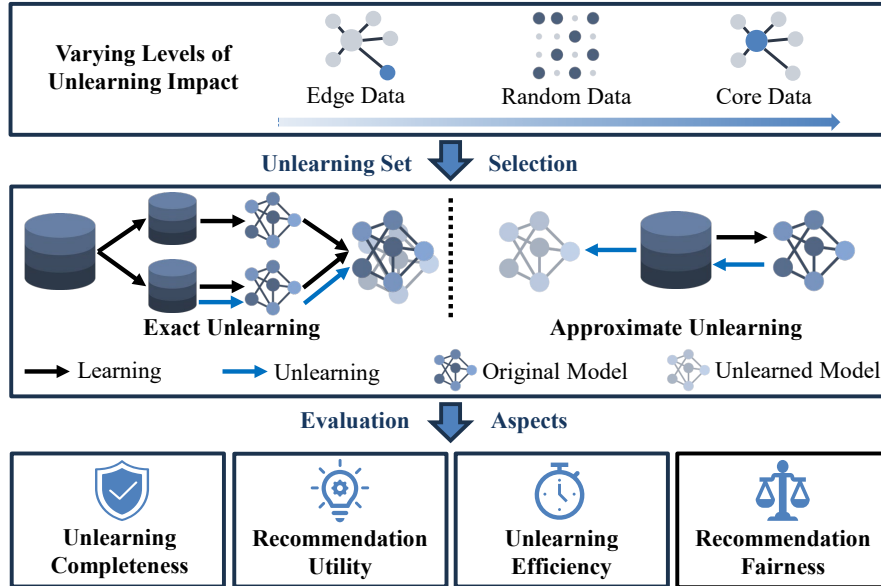

Figure 1: An illustration of CURE4Rec, a comprehensive benchmark tailored for evaluating recommendation unlearning methods. CURE4Rec evaluates unlearning methods using data with varying levels of unlearning impact on four aspects, i.e., unlearning completeness, recommendation utility, unlearning efficiency, and recommendation fairness.

32 need for unlearning to preserve privacy. The task of machine unlearning in recommender systems is  
 33 termed as recommendation unlearning.

34 While machine unlearning has demonstrated significant potential in preserving user privacy, con-  
 35 ducting a comprehensive evaluation of unlearning methods continues to pose difficulties. Various  
 36 unlearning methods employ distinct evaluation metrics, yet a universally applicable evaluation frame-  
 37 work remains absent. Specifically, existing evaluation methods predominantly focus on the unlearning  
 38 completeness, unlearning efficiency, and its impact on model utility, overlooking the deeper influence  
 39 of model properties.

40 In this paper, we identify two overlooked aspects of deeper influence. *Firstly*, fairness is a crucial con-  
 41 sideration for recommendations (Wang et al., 2023), but is often neglected in unlearning evaluations.  
 42 Ensuring fair recommendation outcomes can avoid user discrimination and enrich the recommenda-  
 43 tion platform’s understanding of user preferences. Existing studies demonstrate that unlearning can  
 44 affect the fairness of models (Oesterling et al., 2024). *Secondly*, existing evaluation methods neglect  
 45 the influence of various unlearning sets, randomly selecting data for unlearning. Distinct unlearning  
 46 sets, however, can result in significantly different impacts on model performance (Fan et al., 2024).  
 47 Performing comprehensive evaluations on different unlearning data contributes to understanding the  
 48 robustness of unlearning methods.

49 To address these issues, we introduce CURE4Rec, a comprehensive benchmark specifically designed  
 50 to evaluate recommendation unlearning methods. As shown in Figure 1, CURE4Rec’s evaluation en-  
 51 compasses four aspects, i.e., unlearning completeness, recommendation utility, unlearning efficiency,  
 52 and recommendation fairness. Additionally, each aspect is investigated with three data selection  
 53 strategies, i.e., core data, edge data, and random data. This triadic breakdown tests to reflect the  
 54 robustness of recommendation unlearning methods towards different unlearning sets. The main  
 55 contributions of this work are summarized as follows:

- 56 • We introduce CURE4Rec, a comprehensive benchmark tailored for evaluating recommendation  
 57 unlearning methods. CURE4Rec enables evaluation across multiple aspects, including unlearning  
 58 completeness, recommendation utility, unlearning efficiency, and recommendation fairness.

- 59 • To the best of our knowledge, we are the first to investigate the impact of unlearning on recommen-  
60 dation fairness, introducing fairness evaluation to comprehensively grasp its impact and proposing  
61 additional requirements to consider for further research.
- 62 • We further examine the impact of different unlearning sets. Based on the level of collaboration,  
63 we select core data, edge data, and random data to construct unlearning sets respectively, aim-  
64 ing to thoroughly explore the impact towards unlearning completeness, recommendation utility,  
65 unlearning efficiency, and recommendation fairness.
- 66 • We offer multiple datasets tailored for evaluation using our CURE4Rec. Furthermore, we con-  
67 duct extensive experiments across existing recommendation unlearning methods and report their  
68 performance (refer to Figure 2 for an overview of our results).

## 69 **2 Related Work**

### 70 **2.1 Machine Unlearning**

71 Machine unlearning aims to eliminate the memory of specific data, serving purposes such as privacy  
72 protection (Liu et al., 2022) and erasing data biases (Sattigeri et al., 2022; Chen et al., 2024).  
73 According to the level of unlearning completeness, existing machine unlearning methods can be  
74 categorized into two approaches, i.e., exact unlearning and approximate unlearning.

75 *Exact Unlearning (EU)* aims to completely eliminate the influence of target data on the model. The  
76 most straightforward method of exact unlearning is retraining the model from scratch on the updated  
77 dataset (removing the target data), but this method incurs a significant computational time cost. To  
78 mitigate this cost, existing EU methods revamp the training process via ensemble learning, which  
79 limits the retraining cost to sub-datasets or sub-models (Bourtole et al., 2021; Yan et al., 2022).

80 *Approximate Unlearning (AU)* achieve unlearning through direct parameter manipulation, avoiding  
81 the significant time cost of retraining. Most AU methods utilize gradients or influence function to  
82 estimate the influence of target data and subsequently remove it from models (Sekhari et al., 2021;  
83 Wu et al., 2022; Mehta et al., 2022). Alternatively, other methods directly prune or dampen model  
84 parameters to achieve unlearning (Wang et al., 2022; Foster et al., 2024).

### 85 **2.2 Recommendation Unlearning**

86 Recommendation unlearning aims to eliminate the influence of target data within the recommender  
87 system. A naive approach to achieve recommendation unlearning is through the direct application  
88 of the classic unlearning method, i.e., SISA (Bourtole et al., 2021). Due to the collaborative  
89 characteristics of recommendation data, tailored methods have been proposed to improve SISA for  
90 recommendation unlearning, e.g., RecEraser (Chen et al., 2022) and UltraRE (Li et al., 2023a). In  
91 addition to EU methods mentioned above, AU method also enters the scene, utilizing refined influence  
92 functions to enable recommendation unlearning (Li et al., 2023b).

### 93 **2.3 Machine Unlearning Benchmarks**

94 Emerging research has pioneered early investigation into unlearning benchmarks, focusing on image  
95 classification (Choi & Na, 2023), large language models (Maini et al., 2024; Li et al., 2024), and  
96 diffusion models (Zhang et al., 2024). By proposing new datasets or modifying existing ones, these  
97 investigations design depth evaluation metrics within their corresponding domains. However, these  
98 benchmarks leave unexplored deeper influence of unlearning on model properties, i.e., fairness and  
99 robustness. This exploration is crucial for recommender systems, as alternations in the performance  
100 of recommendation models immediately affect recommendation lists, eventually influencing use  
101 experience. To the best of our knowledge, we are the first to introduce a recommendation unlearning  
102 benchmark, and comprehensively explore the deeper influence of unlearning on recommendation  
103 fairness and robustness.

## 104 3 CURE4Rec

105 In this section, we first recall the process of recommendation unlearning, outlining the necessary  
106 inputs for evaluations. Then, we introduce evaluation aspects of our proposed CURE4Rec, detailing  
107 specific metrics for each aspect. Finally, we present the strategy for unlearning set selection.

### 108 3.1 Recommendation Unlearning

109 The entire process of recommendation unlearning consists of four stages: I) completing learning  
110 process to generate the original model; II) determining the unlearning set, i.e., the unlearning target,  
111 which is a subset of training data; III) conducting unlearning process based on the original model to  
112 produce the unlearned model; and IV) evaluating the unlearned model. To ensure reliable evaluation,  
113 we evaluate unlearning methods using identical training and testing data, employing the same learning  
114 process to generate the same original model. This ensures that all unlearning methods start from the  
115 same baseline in stage I. To investigate unlearning robustness, we select three types of unlearning sets  
116 in stage II (Section 3.3). In stage IV, CURE4Rec’s evaluation includes the four aspects (Section 3.2).

117 In the context of recommendation, unlearning targets may vary among users, items, and user-item  
118 interactions. Commonly, recommendation unlearning scenarios focus on user-wise unlearning (Li  
119 et al., 2023a). Thus, our benchmark primarily investigates the user-wise unlearning scenarios.

### 120 3.2 Evaluation Aspects

121 **Unlearning Completeness.** Unlearning completeness stands as the primary goal and fundamental  
122 requirement of recommendation unlearning. Exact unlearning methods inherently guarantee unlearn-  
123 ing completeness by retraining, which is the only authorized approach (Thudi et al., 2022). On the  
124 other hand, approximate unlearning methods, lacking the ability to achieve authorized unlearning,  
125 often require the demonstration of unlearning completeness through theoretical proofs or empirical  
126 studies. Therefore, following the completeness evaluation of approximate unlearning in previous  
127 studies (Graves et al., 2021; Ma et al., 2022; Li et al., 2023b; Kurmanji et al., 2024), we evaluate  
128 unlearning completeness of recommendation unlearning based on the attacking performance of  
129 Membership Inference Oracle (MIO).

130 MIO follows the standard membership inference procedure to evaluate unlearning completeness in  
131 image classification task (Graves et al., 2021; Ma et al., 2022). In the context of recommendation,  
132 we concatenate user embeddings with the average item embeddings of their respective interacted  
133 items as the data features, and the probability of being in the training set as the data label. Please  
134 refer to Section A.2 for more training details. To evaluate unlearning completeness, we query MIO  
135 with the unlearned data points. Ideally, MIO outputs 1 (indicating presence in the training set) for  
136 the original model and 0 (indicating absence from the training set) for the unlearned model. Since  
137 exact unlearning methods guarantee complete unlearning, we only evaluate the completeness of  
138 approximate unlearning methods.

139 **Recommendation Utility.** Recommendation unlearning aims to erase the memory of target data  
140 within recommender systems without causing harm to the knowledge acquired from the remaining  
141 data. Thus, preserving the recommendation utility of the remaining data is another important goal of  
142 unlearning. To investigate the impact of unlearning on model utility, we employ two widely used  
143 metrics, i.e., Normalized Discounted Cumulative Gain (NDCG) and Hit Ratio (HR), to evaluate the  
144 recommendation performance of the unlearned model on the testing set. For both metrics, we truncate  
145 the ranked list to 20 items.

146 **Unlearning Efficiency.** Retraining from scratch represents the gold standard in unlearning, but  
147 its practical implementation carries a prohibitive computational overhead. Recommender systems  
148 encompass hundreds of thousands of users, generating a large amount of unlearning requests. There-  
149 fore, improving unlearning efficiency is a crucial goal of recommendation unlearning. We measure

150 unlearning efficiency by the total runtime of the entire unlearning process, i.e., stage III. Note that we  
151 enable parallel training for exact unlearning.

152 **Recommendation Fairness.** Previous research has demonstrated that unlearning affects deeper  
153 model properties such as fairness (Oesterling et al., 2024). Mitigating the negative impact of  
154 unlearning is also an important requirement of unlearning. In this paper, we evaluate the group  
155 fairness of recommendation unlearning from the following two perspectives: i) the fairness between  
156 active and inactive groups (A-IGF), and ii) the fairness among different shards (shardGF), as exact  
157 unlearning methods divide the datasets into multiple shards.

158 For A-IGF, we follow the representative user-oriented group fairness research in recommendation (Li  
159 et al., 2021). Based on the number of interactions, we classify the top 5% of users as the active group  
160 and the remaining 95% users as the inactive group. Active and inactive users are selected outside the  
161 unlearning set, because we aim to investigate the impact on the remainder users. Then we compute  
162 the difference of the average recommendation utility, i.e., NDCG@20, between active and inactive  
163 groups to represent A-IGF. For shardGF, we report the variance of recommendation utility among all  
164 shards to compare the shard-level fairness (Rastegarpanah et al., 2019). Note that we do not compute  
165 shardGF for approximate unlearning, because these methods do not involve sharding.

### 166 3.3 Unlearning Set Selection

167 Existing evaluation methods typically select data randomly for the unlearning set. However, previous  
168 studies have shown that i) poisoned data can be constructed to make it hard to unlearn (Marchant  
169 et al., 2022), and ii) different data points have varying difficulty of unlearning (Fan et al., 2024).  
170 Motivated by these findings, in this paper, we explore the impact of using varying unlearning sets,  
171 which can also reflect the robustness of unlearning.

172 To significantly demonstrate this impact, we adopt a model-agnostic selection strategy to create  
173 three types of unlearning sets: core data (which impacts many other data points), edge data (with  
174 minimal impact on others), and random data. Specifically, we regard the user-item interactions as a  
175 non-weighted bipartite graph, where users and items are represented as nodes, and an edge connects  
176 them if there is an interaction. Existing research suggests that a node’s importance correlates strongly  
177 with its centrality in a graph (Haveliwala, 2002; Li et al., 2012; Park et al., 2019). In the context of  
178 recommendation, centrality is associated with collaborations, manifested as neighbors in a graph.  
179 Thus, we define the importance of a node  $x$  as follows:

$$I(x) = c(x) \cdot \frac{\sum_{y \in N(x)} c(y)}{|N(x)|}, \quad (1)$$

180 where  $c(x)$  denotes the centrality of node  $x$ , and  $N(x)$  denotes the number of neighbors of node  $x$ .  
181 Due to the collaborative characteristic of recommendation data, we use the degree of node, i.e., the  
182 number of first-order neighbors, to compute centrality. Finally, we rank all nodes based on  $I(x)$  to  
183 select the core data and edge data.

## 184 4 Experimental Setup

### 185 4.1 Datasets

186 We conduct experiments on three real-world datasets widely used in recommendation. **ML-100K**<sup>1</sup>:  
187 The MovieLens dataset is one of the most extensively utilized datasets in recommender system  
188 research. MovieLens 100k contains 100 thousand individual ratings. **ML-1M**: MovieLens 1M  
189 contains 1 million ratings. **ADM**<sup>2</sup>: The Amazon dataset comprises multiple subsets categorized  
190 according to different types of Amazon products. One of these subsets, known as the Amazon Digital  
191 Music (ADM) dataset, includes ratings of digital music. Following the widely used pre-processing

<sup>1</sup><https://grouplens.org/datasets/movielens/>

<sup>2</sup><http://jmcauley.ucsd.edu/data/amazon/>

192 procedure (He et al., 2017; Wang et al., 2019; He et al., 2020), we convert ratings into implicit  
 193 feedback. The statistical details of these datasets are summarized in Table 4. To avoid extreme  
 194 sparsity, we filter out the users and items that have less than 5 interactions. For each dataset, we  
 195 randomly select 80% ratings as the training set, 10% ratings as the validation set, and the remaining  
 196 as the test set. The unlearning ratio, i.e., the percentage of unlearning set within the training set, is  
 197 initially set as 5%. We also explore this ratio within a range of (5%, 10%, 15%, 20%) in Appendix B.4.

## 198 4.2 Recommendation Models

199 Aligning with existing studies on recommendation unlearning (Chen et al., 2022; Li et al., 2023b,a),  
 200 we use three representative recommendation models based on collaborative filtering for evaluation:

- 201 • **WMF**: Weighted Matrix Factorization(WMF) (Chen et al., 2020) is a non-sampling recommen-  
 202 dation model that treats all missing interactions as negative interactions and assigns them with  
 203 uniform weights.
- 204 • **BPR**: Bayesian Personalized Ranking (Rendle et al., 2012) is a widely used recommendation model  
 205 that uses a Bayesian personalized ranking objective function to optimize matrix factorization.
- 206 • **LightGCN**: LightGCN (He et al., 2020) is the state-of-the-art collaborative filtering model, which  
 207 improves recommendation performance by simplifying graph neural networks.

## 208 4.3 Unlearning Methods

209 We consider the following recommendation unlearning methods, including both EU and AU ap-  
 210 proaches (note that we set the number of shards to 10 for EU and explore other values in Section 5.5):

- 211 • **Retrain**: Retraining from scratch is the goal standard unlearning method.
- 212 • **SISA**: SISA (Bourtoule et al., 2021) stands as the classic algorithm for machine unlearning,  
 213 adaptable to various scenarios, including recommender systems.
- 214 • **RecEraser**: RecEraser (Chen et al., 2022) is specifically designed for recommendation unlearning,  
 215 which modifies SISA to boost performance in recommendation tasks.
- 216 • **UltraRE**: UltraRE (Li et al., 2023a) enhances RecEraser for recommendation tasks by modifying  
 217 two key stages, i.e., division and aggregation.
- 218 • **SCIF**: SCIF (Li et al., 2023b) is the first approximate unlearning method in recommendation  
 219 systems, employing influence functions tailored for recommendation tasks.

## 220 4.4 Parameters Settings

221 In the training phase of original models, we  
 222 randomly sample 4 negative items for each ob-  
 223 served interaction following (He et al., 2017).  
 224 In the case of model-specific hyper-parameters,  
 225 we tune them in the ranges suggested by their  
 226 original papers. In detail, the batch size is set to  
 227 512, the learning rate is set to 0.01, the embed-  
 228 ding size is set to 32. The maximum number of  
 229 epochs is set to 500. The early stopping strategy  
 230 is adopted in our experiments, which terminates  
 231 the training when NDCG@20 on the validation  
 232 set does not increase for 5 successive epochs.

## 233 5 Results and Discussion

234 In this section, we report and analyze the results  
 235 regarding four evaluation aspects under three selections of unlearning sets. We present a visualized  
 236 overview of compared recommendation unlearning methods in Figure 2. We observe that apart

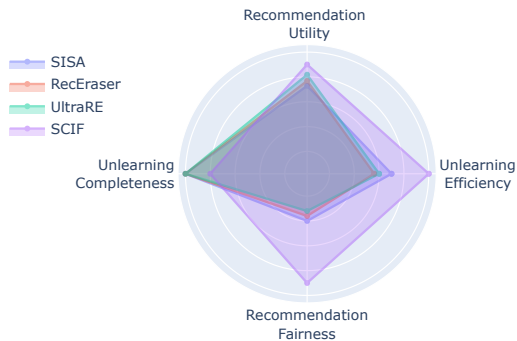

Figure 2: A visualized evaluation overview of recommendation unlearning methods in four aspects (↑), where the result is the normalized average outcome obtained across all models and datasets, using random data as the unlearning set. The recommendation fairness is measured by A-IGF (fairness between active and inactive users).

Table 1: Results in terms of unlearning completeness (MIO accuracy - approaching 0.5), recommendation utility (NDCG and HR  $\uparrow$ ), and recommendation fairness (A-IGF - approaching Retrain) for the approximate recommendation unlearning method, where Learn denotes the results before unlearning. Core, random, and edge respectively refer to the selection of the unlearning sets as core data, random data, and edge data.

|         |        | ML-100K |        |       |         | ML-1M   |        |       |         | ADM     |        |       |        |
|---------|--------|---------|--------|-------|---------|---------|--------|-------|---------|---------|--------|-------|--------|
|         |        | NDCG@20 | HR@20  | MIO   | A-IGF   | NDCG@20 | HR@20  | MIO   | A-IGF   | NDCG@20 | HR@20  | MIO   | A-IGF  |
| Learn   |        | 0.3215  | 0.3415 | 0.722 | -0.0450 | 0.2144  | 0.2112 | 0.741 | -0.042  | 0.0277  | 0.0578 | 0.756 | 0.0167 |
| Retrain | Core   | 0.3187  | 0.3295 | 0.540 | -0.0184 | 0.2196  | 0.2174 | 0.544 | -0.0188 | 0.0221  | 0.0446 | 0.555 | 0.0053 |
|         | Random | 0.2872  | 0.3353 | 0.538 | -0.0403 | 0.2124  | 0.2108 | 0.547 | -0.0507 | 0.0252  | 0.0519 | 0.556 | 0.0141 |
|         | Edge   | 0.3091  | 0.3140 | 0.536 | -0.0430 | 0.2148  | 0.2051 | 0.546 | -0.0518 | 0.0272  | 0.0554 | 0.556 | 0.0164 |
| SCIF    | Core   | 0.2483  | 0.2382 | 0.561 | -0.0322 | 0.1865  | 0.1629 | 0.569 | -0.0213 | 0.0194  | 0.0398 | 0.571 | 0.0094 |
|         | Random | 0.2699  | 0.2617 | 0.563 | -0.0268 | 0.1922  | 0.1785 | 0.571 | -0.0311 | 0.0227  | 0.0461 | 0.575 | 0.0106 |
|         | Edge   | 0.2894  | 0.3012 | 0.601 | -0.0375 | 0.2031  | 0.1811 | 0.623 | -0.0191 | 0.0245  | 0.0502 | 0.579 | 0.0103 |

Table 2: Results in terms of recommendation utility for exact recommendation unlearning methods.

|          |         | Retrain |        |        | SISA   |        |        | RecEraser |        |        | UltraRE |        |        |
|----------|---------|---------|--------|--------|--------|--------|--------|-----------|--------|--------|---------|--------|--------|
|          |         | Core    | Random | Edge   | Core   | Random | Edge   | Core      | Random | Edge   | Core    | Random | Edge   |
| ML-100K  | NDCG@20 | 0.3187  | 0.2872 | 0.3091 | 0.2096 | 0.2092 | 0.2041 | 0.2285    | 0.2208 | 0.2109 | 0.2303  | 0.2354 | 0.2149 |
|          | HR@20   | 0.3295  | 0.3353 | 0.3140 | 0.2094 | 0.2049 | 0.1892 | 0.2218    | 0.2142 | 0.1979 | 0.2267  | 0.2282 | 0.2027 |
| BPR      | NDCG@20 | 0.3111  | 0.3003 | 0.3043 | 0.2244 | 0.2324 | 0.2298 | 0.2614    | 0.2615 | 0.2694 | 0.2708  | 0.2764 | 0.2743 |
|          | HR@20   | 0.3151  | 0.3028 | 0.2987 | 0.2203 | 0.2259 | 0.2179 | 0.2724    | 0.2658 | 0.2620 | 0.2851  | 0.2813 | 0.2695 |
| LightGCN | NDCG@20 | 0.3175  | 0.3121 | 0.3101 | 0.1802 | 0.1932 | 0.1964 | 0.2856    | 0.2905 | 0.2886 | 0.2952  | 0.3069 | 0.3063 |
|          | HR@20   | 0.3250  | 0.3253 | 0.3244 | 0.1724 | 0.1907 | 0.1911 | 0.3053    | 0.3099 | 0.3121 | 0.3123  | 0.3201 | 0.3185 |
| ML-1M    | NDCG@20 | 0.2196  | 0.2124 | 0.2148 | 0.1780 | 0.1639 | 0.1714 | 0.1894    | 0.1796 | 0.1838 | 0.1926  | 0.1891 | 0.1970 |
|          | HR@20   | 0.2174  | 0.2108 | 0.2051 | 0.1612 | 0.1485 | 0.1493 | 0.1731    | 0.1592 | 0.1596 | 0.1747  | 0.1680 | 0.1717 |
| BPR      | NDCG@20 | 0.2462  | 0.2319 | 0.2336 | 0.1545 | 0.1530 | 0.1628 | 0.1826    | 0.1660 | 0.1860 | 0.1828  | 0.1856 | 0.1913 |
|          | HR@20   | 0.2279  | 0.2162 | 0.2118 | 0.1353 | 0.1329 | 0.1367 | 0.1627    | 0.1450 | 0.1624 | 0.1652  | 0.1632 | 0.1651 |
| LightGCN | NDCG@20 | 0.2177  | 0.2108 | 0.2147 | 0.1504 | 0.1533 | 0.1642 | 0.1864    | 0.1863 | 0.1814 | 0.1969  | 0.1867 | 0.1806 |
|          | HR@20   | 0.2138  | 0.2045 | 0.2186 | 0.1365 | 0.1323 | 0.1581 | 0.1825    | 0.1804 | 0.1818 | 0.1907  | 0.1855 | 0.1798 |
| ADM      | NDCG@20 | 0.3691  | 0.3566 | 0.3556 | 0.2720 | 0.2589 | 0.2515 | 0.3373    | 0.3256 | 0.3185 | 0.3420  | 0.3334 | 0.3347 |
|          | HR@20   | 0.4071  | 0.3822 | 0.3848 | 0.2617 | 0.2492 | 0.2471 | 0.3527    | 0.3467 | 0.3203 | 0.3689  | 0.3595 | 0.3501 |
| BPR      | NDCG@20 | 0.3566  | 0.3453 | 0.3499 | 0.2806 | 0.2708 | 0.2757 | 0.3286    | 0.3295 | 0.3212 | 0.3325  | 0.3301 | 0.3314 |
|          | HR@20   | 0.3821  | 0.3628 | 0.3718 | 0.2745 | 0.2638 | 0.2611 | 0.3486    | 0.3406 | 0.3483 | 0.3541  | 0.3569 | 0.3608 |
| LightGCN | NDCG@20 | 0.0105  | 0.0106 | 0.0096 | 0.0075 | 0.0054 | 0.0048 | 0.0084    | 0.0085 | 0.0079 | 0.0097  | 0.0088 | 0.0086 |
|          | HR@20   | 0.0221  | 0.0234 | 0.0208 | 0.0157 | 0.0112 | 0.0103 | 0.0171    | 0.0176 | 0.0154 | 0.0191  | 0.0185 | 0.0183 |

237 from unlearning completeness, the AU method (SCIF) demonstrates a significant advantage over  
 238 EU methods (SISA, RecEraser, and UltraRE), particularly in terms of unlearning efficiency and  
 239 recommendation fairness. However, it is essential to highlight that unlearning completeness is  
 240 the primary goal of unlearning. EU methods inherently achieve the highest level of completeness,  
 241 whereas SCIF can only achieve weak unlearning.

## 242 5.1 Unlearning Completeness

243 To evaluate the completeness of AU methods, we report the accuracy of MIO in Table 1, where the  
 244 recommendation model is WMF. Due to the space limit, we report the results of other models in  
 245 Appendix B.2. Compared the result of SCIF with the performance before unlearning and Retrain  
 246 after unlearning, we observe that i) both SCIF and Retrain significantly decrease the MIO accuracy,  
 247 indicating their effectiveness in unlearning; ii) although not significant, there is still a marginal gap  
 248 between SCIF and Retrain (ground truth), i.e., 4.1% higher accuracy than Retrain on average; and iii)  
 249 SCIF particularly performance worse on edge data compared to other data types. This discrepancy  
 250 may be attributed to imprecise influence estimation for this specific data category.

Table 3: Results in terms of unlearning efficiency (running time in seconds ↓).

| Time (s)  |        | ML-100K |      |          | ML-1M |      |          | ADM  |      |          |
|-----------|--------|---------|------|----------|-------|------|----------|------|------|----------|
|           |        | WMF     | BPR  | LightGCN | WMF   | BPR  | LightGCN | WMF  | BPR  | LightGCN |
| Retrain   | Core   | 4296    | 5238 | 4734     | 7748  | 9113 | 8645     | 3682 | 6998 | 5225     |
|           | Random | 4526    | 5494 | 5044     | 8693  | 9461 | 10324    | 3972 | 7127 | 5354     |
|           | Edge   | 4687    | 5527 | 5274     | 8006  | 9748 | 10497    | 4127 | 7351 | 6359     |
| SISA      | Core   | 402     | 488  | 437      | 1160  | 1160 | 1523     | 669  | 1750 | 1009     |
|           | Random | 467     | 586  | 528      | 1256  | 1265 | 1605     | 717  | 1842 | 1246     |
|           | Edge   | 442     | 504  | 515      | 1280  | 1292 | 1659     | 751  | 1902 | 1077     |
| RecEraser | Core   | 463     | 582  | 561      | 1533  | 1568 | 1846     | 865  | 1892 | 1106     |
|           | Random | 476     | 693  | 656      | 1654  | 1660 | 1952     | 912  | 1945 | 1490     |
|           | Edge   | 489     | 659  | 617      | 1736  | 1819 | 1964     | 965  | 2032 | 1190     |
| UltraRE   | Core   | 457     | 591  | 559      | 1507  | 1493 | 1667     | 819  | 1810 | 1057     |
|           | Random | 482     | 618  | 645      | 1595  | 1550 | 1834     | 901  | 1862 | 1283     |
|           | Edge   | 466     | 518  | 666      | 1781  | 1791 | 1955     | 923  | 1904 | 1368     |
| SCIF      | Core   | 289     | 336  | 316      | 784   | 784  | 1034     | 453  | 1186 | 682      |
|           | Random | 325     | 403  | 368      | 862   | 860  | 1083     | 497  | 1242 | 841      |
|           | Edge   | 316     | 358  | 359      | 887   | 877  | 1126     | 520  | 1282 | 733      |

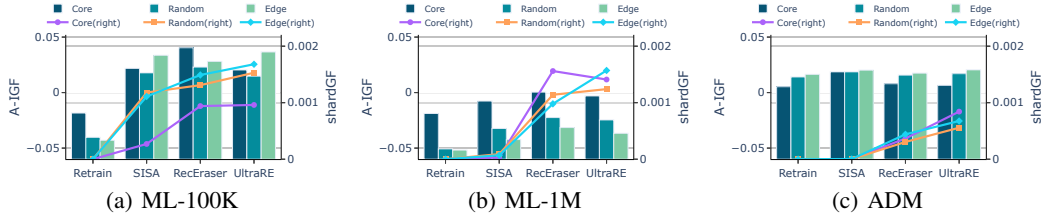

Figure 3: Results in terms of recommendation fairness for exact recommendation unlearning methods on WMF, where A-IGF (approaching Retrain) and shardGF (↓) evaluate the fairness of group-level and shard-level, respectively.

## 251 5.2 Recommendation Utility

252 We report the results in terms of recommendation utility for AU and EU in Tables 1 and 2, respectively.  
 253 In general, the AU method (SCIF) outperforms the EU methods (SISA, RecEraser, and UltraRE).  
 254 Employing the same unlearning set, RecEraser and UltraRE consistently outperform SISA across all  
 255 datasets and models, with UltraRE generally surpassing RecEraser, aligning with previous research (Li  
 256 et al., 2023a).

257 For all EU methods, the recommendation utility of unlearning core users is generally higher than  
 258 that of unlearning random-select or edge users. This is likely due to the removal of data from more  
 259 interactive users, which typically contains a large amount of ratings. This enables the model to  
 260 learn more effectively from the smaller amount of remaining training data. Compared with these  
 261 EU methods, SCIF exhibits the highest recommendation utility, closely resembling that of Retrain.  
 262 However, SCIF suffers the most substantial performance decline when unlearning core users. This  
 263 can be attributed to the increased number of interactions involved in calculating the influence function,  
 264 leading to inaccurate influence estimation that negatively impacts the model utility.

## 265 5.3 Unlearning Efficiency

266 We report the unlearning times in Table 3. In general, SCIF is more efficient than EU methods.  
 267 Among the EU methods, SISA saves more time compared to RecEraser and UltraRE, because it  
 268 does not have the complex division and aggregation stage specific to the recommendation scenarios.  
 269 Due to its design, UltraRE is slightly more efficient than RecEraser. Additionally, EU methods take  
 270 less time to unlearn core users since they have a larger amount of interaction data. This reduces the



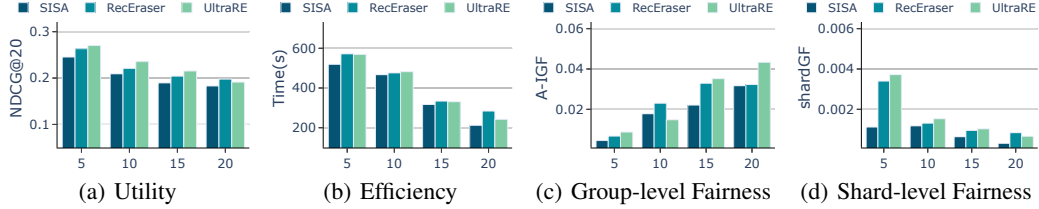

Figure 4: Effect of shard number in terms of multiple aspects, i.e., recommendation utility ( $\uparrow$ ), unlearning efficiency ( $\downarrow$ ), group-level fairness (approaching Retrain), and shard-level fairness ( $\downarrow$ ).

271 amount of data left for retraining. On the contrary, SCIF requires more computations for influence  
 272 estimation on core users, resulting in higher time costs compared to unlearning random or edge users.

## 273 5.4 Recommendation Fairness

274 We also report the recommendation fairness of AU and EU methods in Table 1 and Figure 3,  
 275 respectively. For the *group-level fairness* (A-IGF), compared to the AU method (SCIF), EU methods  
 276 notably worsen unfairness, tending to favor active users. This is primarily attributed to the division  
 277 stage of EU methods, with this effect becoming more pronounced on larger datasets, i.e., ML-1M and  
 278 ADM. Moreover, RecEraser and UltraRE, which group active users together instead of randomly, as  
 279 done by SISA, exacerbate unfairness even further. For the *shard-level fairness* (shardGF), although to  
 280 a lesser extent compared to group-level fairness, RecEraser and UltraRE also exacerbate unfairness.

## 281 5.5 Effects of Shard Number

282 We report the effect of shard number in terms of multiple aspects in Figure 4, using WMF on  
 283 ML-100K. *Firstly*, as the number of shards increases, the unlearning efficiency improves, but the  
 284 recommendation utility deteriorates, as confirmed by several previous studies (Chen et al., 2022;  
 285 Li et al., 2023a). *Secondly*, the increased shard number further groups the active users into smaller  
 286 shards, exacerbating the group-level fairness. At the same time, it reduces the discrepancy among all  
 287 shards, diminishing the shard-level fairness.

## 288 6 Conclusion

289 In this paper, we present a comprehensive benchmark, CURE4Rec, for recommendation unlearning  
 290 methods, aiming to analyze and inspire further exploration into the deeper influence of recom-  
 291 mendation unlearning. Specifically, CURE4Rec covers four evaluation aspects, i.e., unlearning  
 292 completeness, recommendation utility, unlearning efficiency, and recommendation fairness. Ad-  
 293 ditionally, we investigate unlearning robustness across three unlearning sets, i.e., core data, edge  
 294 data, and random data. Through extensive experiments, we compare the performance of various  
 295 recommendation unlearning methods using our proposed benchmark. Our experiments reveal that i)  
 296 the division-aggregation design of the EU approach has dual implications. On one hand, it inherently  
 297 achieves unlearning completeness. On the other hand, it compromises other evaluation aspects. and  
 298 ii) The AU approach, which directly manipulates model parameters, outperforms the EU approach in  
 299 all aspects except completeness, with less negative influence on model properties, e.g., fairness.

300 **Limitation and Boarder Impact.** This paper proposes a benchmark for recommendation un-  
 301 learning, comprising four evaluation aspects. This design also offers insights for other unlearning  
 302 scenarios. Simultaneously, there is considerable room for improvement in the specific evaluation  
 303 metrics within each aspect. For example, concerning unlearning completeness, a recent study suggests  
 304 a game-theoretic view to expand completeness evaluation to the EU approach. Additionally, the AU  
 305 approach appears to outperform the EU approach in all aspects except completeness. The trade-off  
 306 between completeness and other aspects is an intriguing direction that is not discussed in this paper.

307 **References**

- 308 Bourtole, L., Chandrasekaran, V., Choquette-Choo, C. A., Jia, H., Travers, A., Zhang, B., Lie, D.,  
309 and Papernot, N. Machine unlearning. In *2021 IEEE Symposium on Security and Privacy (SP)*, pp.  
310 141–159. IEEE, 2021.
- 311 Chen, C., Zhang, M., Zhang, Y., Liu, Y., and Ma, S. Efficient neural matrix factorization without  
312 sampling for recommendation. *ACM Transactions on Information Systems (TOIS)*, 38(2):1–28,  
313 2020.
- 314 Chen, C., Sun, F., Zhang, M., and Ding, B. Recommendation unlearning. In *Proceedings of the ACM*  
315 *Web Conference 2022*, pp. 2768–2777, 2022.
- 316 Chen, J. and Yang, D. Unlearn what you want to forget: Efficient unlearning for llms. In *Proceedings*  
317 *of the 2023 Conference on Empirical Methods in Natural Language Processing*, pp. 12041–12052,  
318 2023.
- 319 Chen, R., Yang, J., Xiong, H., Bai, J., Hu, T., Hao, J., Feng, Y., Zhou, J. T., Wu, J., and Liu, Z. Fast  
320 model debias with machine unlearning. *Advances in Neural Information Processing Systems*, 36,  
321 2024.
- 322 Choi, D. and Na, D. Towards machine unlearning benchmarks: Forgetting the personal identities in  
323 facial recognition systems. *arXiv preprint arXiv:2311.02240*, 2023.
- 324 Eldan, R. and Russinovich, M. Who’s harry potter? approximate unlearning in llms. *arXiv preprint*  
325 *arXiv:2310.02238*, 2023.
- 326 Fan, C., Liu, J., Hero, A., and Liu, S. Challenging forgets: Unveiling the worst-case forget sets in  
327 machine unlearning. *arXiv preprint arXiv:2403.07362*, 2024.
- 328 Foster, J., Schoepf, S., and Brintrup, A. Fast machine unlearning without retraining through selective  
329 synaptic dampening. In *Proceedings of the AAAI Conference on Artificial Intelligence*, volume 38,  
330 pp. 12043–12051, 2024.
- 331 Fredrikson, M., Jha, S., and Ristenpart, T. Model inversion attacks that exploit confidence information  
332 and basic countermeasures. In *Proceedings of the 22nd ACM SIGSAC conference on computer*  
333 *and communications security*, pp. 1322–1333, 2015.
- 334 Graves, L., Nagisetty, V., and Ganesh, V. Amnesiac machine learning. In *Proceedings of the AAAI*  
335 *Conference on Artificial Intelligence*, volume 35, pp. 11516–11524, 2021.
- 336 Gupta, V., Jung, C., Neel, S., Roth, A., Sharifi-Malvajerdi, S., and Waites, C. Adaptive machine  
337 unlearning. *Advances in Neural Information Processing Systems*, 34:16319–16330, 2021.
- 338 Haveliwala, T. H. Topic-sensitive pagerank. In *Proceedings of the 11th international conference on*  
339 *World Wide Web*, pp. 517–526, 2002.
- 340 He, X., Liao, L., Zhang, H., Nie, L., Hu, X., and Chua, T.-S. Neural collaborative filtering. In  
341 *Proceedings of the 26th international conference on world wide web*, pp. 173–182, 2017.
- 342 He, X., Deng, K., Wang, X., Li, Y., Zhang, Y., and Wang, M. Lightgcn: Simplifying and powering  
343 graph convolution network for recommendation. In *Proceedings of the 43rd International ACM*  
344 *SIGIR conference on research and development in Information Retrieval*, pp. 639–648, 2020.
- 345 Information, C. L. California senate bill 362, 2023. URL [https://leginfo.legislature.ca.gov/faces/billNavClient.xhtml?bill\\_id=202120220SB362](https://leginfo.legislature.ca.gov/faces/billNavClient.xhtml?bill_id=202120220SB362).
- 347 Kurmanji, M., Triantafillou, P., Hayes, J., and Triantafillou, E. Towards unbounded machine  
348 unlearning. *Advances in Neural Information Processing Systems*, 36, 2024.

- 349 Li, N., Pan, A., Gopal, A., Yue, S., Berrios, D., Gatti, A., Li, J. D., Dombrowski, A.-K., Goel, S.,  
350 Phan, L., et al. The wmdp benchmark: Measuring and reducing malicious use with unlearning.  
351 *arXiv preprint arXiv:2403.03218*, 2024.
- 352 Li, X., Ng, M. K., and Ye, Y. Har: hub, authority and relevance scores in multi-relational data for  
353 query search. In *Proceedings of the 2012 SIAM International Conference on Data Mining*, pp.  
354 141–152. SIAM, 2012.
- 355 Li, Y., Chen, H., Fu, Z., Ge, Y., and Zhang, Y. User-oriented fairness in recommendation. In  
356 *Proceedings of the web conference 2021*, pp. 624–632, 2021.
- 357 Li, Y., Chen, C., Zhang, Y., Liu, W., Lyu, L., Zheng, X., Meng, D., and Wang, J. Ultrare: Enhancing  
358 receraser for recommendation unlearning via error decomposition. *Advances in Neural Information*  
359 *Processing Systems*, 36, 2023a.
- 360 Li, Y., Chen, C., Zheng, X., Zhang, Y., Gong, B., Wang, J., and Chen, L. Selective and collaborative  
361 influence function for efficient recommendation unlearning. *Expert Systems with Applications*,  
362 234:121025, 2023b. ISSN 0957-4174.
- 363 Liu, Y., Fan, M., Chen, C., Liu, X., Ma, Z., Wang, L., and Ma, J. Backdoor defense with machine  
364 unlearning. In *IEEE INFOCOM 2022-IEEE conference on computer communications*, pp. 280–289.  
365 IEEE, 2022.
- 366 Ma, Z., Liu, Y., Liu, X., Liu, J., Ma, J., and Ren, K. Learn to forget: Machine unlearning via neuron  
367 masking. *IEEE Transactions on Dependable and Secure Computing*, 2022.
- 368 Maini, P., Feng, Z., Schwarzschild, A., Lipton, Z. C., and Kolter, J. Z. Tofu: A task of fictitious  
369 unlearning for llms. *arXiv preprint arXiv:2401.06121*, 2024.
- 370 Marchant, N. G., Rubinstein, B. I., and Alfeld, S. Hard to forget: Poisoning attacks on certified  
371 machine unlearning. In *Proceedings of the AAAI Conference on Artificial Intelligence*, volume 36,  
372 pp. 7691–7700, 2022.
- 373 Mehta, R., Pal, S., Singh, V., and Ravi, S. N. Deep unlearning via randomized conditionally  
374 independent hessians. In *Proceedings of the IEEE/CVF Conference on Computer Vision and*  
375 *Pattern Recognition*, pp. 10422–10431, 2022.
- 376 Oesterling, A., Ma, J., Calmon, F., and Lakkaraju, H. Fair machine unlearning: Data removal while  
377 mitigating disparities. In *International Conference on Artificial Intelligence and Statistics*, pp.  
378 3736–3744. PMLR, 2024.
- 379 Pardau, S. L. The california consumer privacy act: Towards a european-style privacy regime in the  
380 united states. *J. Tech. L. & Pol’y*, 23:68, 2018.
- 381 Park, N., Kan, A., Dong, X. L., Zhao, T., and Faloutsos, C. Estimating node importance in knowledge  
382 graphs using graph neural networks. In *Proceedings of the 25th ACM SIGKDD international*  
383 *conference on knowledge discovery & data mining*, pp. 596–606, 2019.
- 384 Rastegarpanah, B., Gummadi, K. P., and Crovella, M. Fighting fire with fire: Using antidote data to  
385 improve polarization and fairness of recommender systems. In *Proceedings of the twelfth ACM*  
386 *international conference on web search and data mining*, pp. 231–239, 2019.
- 387 Rendle, S., Freudenthaler, C., Gantner, Z., and Schmidt-Thieme, L. Bpr: Bayesian personalized  
388 ranking from implicit feedback. *arXiv preprint arXiv:1205.2618*, 2012.
- 389 Sattigeri, P., Ghosh, S., Padhi, I., Dognin, P., and Varshney, K. R. Fair infinitesimal jackknife:  
390 Mitigating the influence of biased training data points without refitting. *Advances in Neural*  
391 *Information Processing Systems*, 35:35894–35906, 2022.

- 392 Sekhari, A., Acharya, J., Kamath, G., and Suresh, A. T. Remember what you want to forget:  
393 Algorithms for machine unlearning. *Advances in Neural Information Processing Systems*, 34:  
394 18075–18086, 2021.
- 395 Thudi, A., Jia, H., Shumailov, I., and Papernot, N. On the necessity of auditable algorithmic  
396 definitions for machine unlearning. In *31st USENIX Security Symposium (USENIX Security 22)*,  
397 pp. 4007–4022, 2022.
- 398 Union, E. General data protection regulation, 2018. URL <https://gdpr-info.eu/>.
- 399 Wang, J., Guo, S., Xie, X., and Qi, H. Federated unlearning via class-discriminative pruning. In  
400 *Proceedings of the ACM Web Conference 2022*, pp. 622–632, 2022.
- 401 Wang, X., He, X., Wang, M., Feng, F., and Chua, T.-S. Neural graph collaborative filtering. In  
402 *Proceedings of the 42nd international ACM SIGIR conference on Research and development in*  
403 *Information Retrieval*, pp. 165–174, 2019.
- 404 Wang, Y., Ma, W., Zhang, M., Liu, Y., and Ma, S. A survey on the fairness of recommender systems.  
405 *ACM Transactions on Information Systems*, 41(3):1–43, 2023.
- 406 Wu, G., Hashemi, M., and Srinivasa, C. Puma: Performance unchanged model augmentation for  
407 training data removal. In *Proceedings of the AAAI conference on artificial intelligence*, volume 36,  
408 pp. 8675–8682, 2022.
- 409 Yan, H., Li, X., Guo, Z., Li, H., Li, F., and Lin, X. Arcane: An efficient architecture for exact machine  
410 unlearning. In *IJCAI*, volume 6, pp. 19, 2022.
- 411 Zhang, Y., Zhang, Y., Yao, Y., Jia, J., Liu, J., Liu, X., and Liu, S. Unlearncanvas: A stylized image  
412 dataset to benchmark machine unlearning for diffusion models. *arXiv preprint arXiv:2402.11846*,  
413 2024.

414 **Checklist**

- 415 1. For all authors...
- 416 (a) Do the main claims made in the abstract and introduction accurately reflect the paper's  
417 contributions and scope? [Yes]
- 418 (b) Did you describe the limitations of your work? [Yes] See Section 6.
- 419 (c) Did you discuss any potential negative societal impacts of your work? [Yes] See  
420 Section 6.
- 421 (d) Have you read the ethics review guidelines and ensured that your paper conforms to  
422 them? [Yes]
- 423 2. If you are including theoretical results...
- 424 (a) Did you state the full set of assumptions of all theoretical results? [N/A]
- 425 (b) Did you include complete proofs of all theoretical results? [N/A]
- 426 3. If you ran experiments (e.g. for benchmarks)...
- 427 (a) Did you include the code, data, and instructions needed to reproduce the main experi-  
428 mental results (either in the supplemental material or as a URL)? [Yes] See Abstract.
- 429 (b) Did you specify all the training details (e.g., data splits, hyperparameters, how they  
430 were chosen)? [Yes] See Section 4.4.
- 431 (c) Did you report error bars (e.g., with respect to the random seed after running experi-  
432 ments multiple times)? [No]
- 433 (d) Did you include the total amount of compute and the type of resources used (e.g., type  
434 of GPUs, internal cluster, or cloud provider)? [Yes] See Section A.3.
- 435 4. If you are using existing assets (e.g., code, data, models) or curating/releasing new assets...
- 436 (a) If your work uses existing assets, did you cite the creators? [Yes] See Section 4.1.
- 437 (b) Did you mention the license of the assets? [N/A]
- 438 (c) Did you include any new assets either in the supplemental material or as a URL? [No]
- 439 (d) Did you discuss whether and how consent was obtained from people whose data you're  
440 using/curating? [N/A]
- 441 (e) Did you discuss whether the data you are using/curating contains personally identifiable  
442 information or offensive content? [N/A]
- 443 5. If you used crowdsourcing or conducted research with human subjects...
- 444 (a) Did you include the full text of instructions given to participants and screenshots, if  
445 applicable? [N/A]
- 446 (b) Did you describe any potential participant risks, with links to Institutional Review  
447 Board (IRB) approvals, if applicable? [N/A]
- 448 (c) Did you include the estimated hourly wage paid to participants and the total amount  
449 spent on participant compensation? [N/A]

## 450 A Experimental Setup

### 451 A.1 Datasets

452 We provide a statistics summary of our used datasets in Table 4.

Table 4: Summary of datasets.

| Dataset | User #  | Item #  | Interactions # | Sparsity |
|---------|---------|---------|----------------|----------|
| ML-100K | 943     | 1,349   | 99,287         | 92.195%  |
| ML-1M   | 6,040   | 3,416   | 999,611        | 95.155%  |
| ADM     | 478,235 | 266,414 | 836,006        | 99.999%  |

### 453 A.2 MIO Training Details

454 Following (Li et al., 2023b), we adopt an ideal concept, i.e., Membership Inference Oracle (MIO),  
455 to evaluate unlearning completeness. Specifically, We implement an approximated MIO via a basic  
456 three-layer (64, 16, 4) neural network with ReLU and Softmax as activation functions for hidden  
457 layers and the output layer respectively. We train the MIO via stochastic gradient descent with 100  
458 epochs and a learning rate of 0.001. The MIO outputs the probability of the queried data point being  
459 in the training set. To evaluate the unlearning completeness, we query MIO with the unlearned data  
460 points. Ideally, MIO outputs 1 (being in the training set) for the original model while outputs 0 (not  
461 being in the training set) for the unlearned model.

### 462 A.3 Hardware Information

463 We run all experiments on the same Ubuntu 20.04 LTS System server with 48-core CPU, 256GB  
464 RAM and NVIDIA GeForce RTX 3090 GPU.

## 465 B More Results

### 466 B.1 Performance Overview

467 We report a visualized overview of compared recommendation unlearning methods on each dataset in  
468 Figure 5. The results are generally consistent with Figure 2.

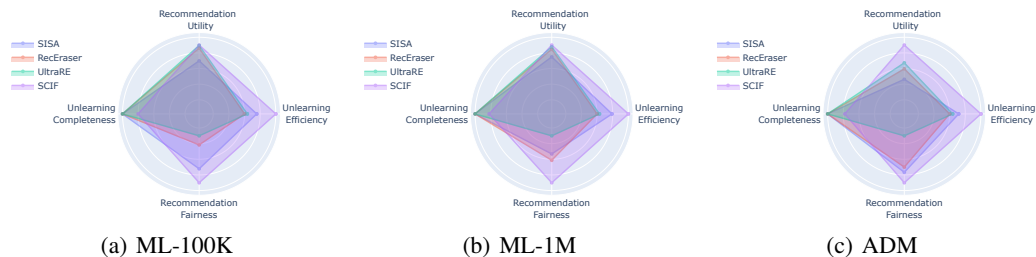

Figure 5: A visualized evaluation overview of recommendation unlearning methods in four aspects ( $\uparrow$ ), where the result is the normalized average outcome obtained across all models, using random data as the unlearning set. The recommendation fairness is measured by A-IGF (fairness between active and inactive users).

### 469 B.2 Unlearning Completeness

470 We report the accuracy of MIO in Table 5, where the recommendation model is BPR. We omit the  
471 results for LightGCN as we encountered difficulties accurately computing the influence function of  
472 SCIF on ML-1M and ADM based on current hardware.

Table 5: Results in terms of unlearning completeness (MIO accuracy - approaching 0.5), recommendation utility (NDCG and HR  $\uparrow$ ), and recommendation fairness (A-IGF - approaching Retrain) for the approximate recommendation unlearning method, where Learn denotes the results before unlearning. Core, random, and edge respectively refer to the selection of the unlearning sets as core data, random data, and edge data.

|         |        | ML-100K |        |       |         | ML-1M   |        |       |         | ADM     |        |       |        |
|---------|--------|---------|--------|-------|---------|---------|--------|-------|---------|---------|--------|-------|--------|
|         |        | NDCG@20 | HR@20  | MIO   | A-IGF   | NDCG@20 | HR@20  | MIO   | A-IGF   | NDCG@20 | HR@20  | MIO   | A-IGF  |
| Learn   |        | 0.3195  | 0.3030 | 0.724 | -0.0246 | 0.2517  | 0.2306 | 0.744 | -0.0651 | 0.0251  | 0.0510 | 0.759 | 0.0194 |
| Retrain | Core   | 0.3111  | 0.3151 | 0.536 | -0.0217 | 0.2462  | 0.2279 | 0.549 | -0.0374 | 0.0246  | 0.0504 | 0.558 | 0.0066 |
|         | Random | 0.3003  | 0.3028 | 0.535 | -0.0153 | 0.2319  | 0.2162 | 0.550 | -0.0605 | 0.0203  | 0.0421 | 0.561 | 0.0187 |
|         | Edge   | 0.3043  | 0.2987 | 0.537 | -0.0175 | 0.2336  | 0.2118 | 0.552 | -0.0633 | 0.0203  | 0.0439 | 0.555 | 0.0191 |
| SCIF    | Core   | 0.2392  | 0.2182 | 0.565 | -0.0116 | 0.1898  | 0.1636 | 0.572 | -0.0284 | 0.0171  | 0.0336 | 0.573 | 0.0096 |
|         | Random | 0.2768  | 0.2824 | 0.566 | -0.0144 | 0.2159  | 0.1886 | 0.576 | -0.0372 | 0.0189  | 0.0357 | 0.573 | 0.0110 |
|         | Edge   | 0.2871  | 0.2905 | 0.612 | -0.0167 | 0.2231  | 0.1942 | 0.635 | -0.0481 | 0.0200  | 0.0417 | 0.588 | 0.0132 |

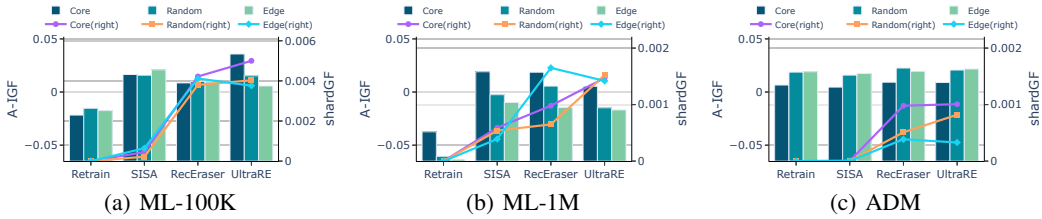

Figure 6: Results in terms of recommendation fairness for exact recommendation unlearning methods on BPR, where A-IGF (approaching Retrain) and shardGF ( $\downarrow$ ) evaluate the fairness of group-level and shard-level, respectively.

### 473 B.3 Recommendation Fairness

474 We report the recommendation fairness of exact unlearning methods on each dataset using BPR and  
 475 LightGCN recommendation models in Figures 6 and 7, respectively.

476 We also report the grouping results of active and inactive users after applying three exact unlearning  
 477 methods, i.e., SISA, RecEraser, UltraRE, on different datasets in Tables 6, 7, and 8. On the one  
 478 hand, SISA randomly distributes both types of users evenly across groups. On the other hand,  
 479 RecEraser and UltraRE tend to cluster active users into the same groups, which results in certain  
 480 groups containing numerous active users while others have almost none. This clustering result  
 481 explains why RecEraser and UltraRE tend to favor active users, as the concentration of active users  
 482 in certain groups significantly increases their proportion compared to random distribution, leading to  
 483 more effective learning but also more severe unfairness.

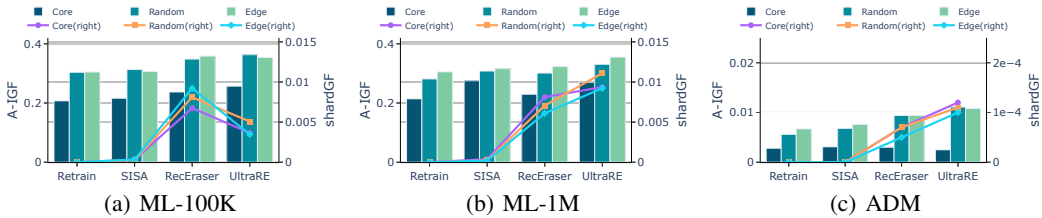

Figure 7: Results in terms of recommendation fairness for exact recommendation unlearning methods on LightGCN, where A-IGF (approaching Retrain) and shardGF ( $\downarrow$ ) evaluate the fairness of group-level and shard-level, respectively.

484 **B.4 Unlearning Ratio**

485 We report the effect of unlearning data ratio in terms of multiple aspects in Figure 8, using WMF on  
 486 ML-100K. We observe consistent results with previous studies (Bourtoule et al., 2021; Chen et al.,  
 487 2022; Li et al., 2023a). In general, as the ratio of unlearning data increases, the recommendation  
 488 utility gradually decreases, along with a reduction in the unlearning time. Additionally, a larger  
 489 unlearning ratio tends to lead to greater fairness.

Table 6: Results of user distribution (active vs. inactive) in each shard on dataset ML-100K. The unlearning data ratio is set to 5%.

| ML-100K   |        | Group 1 |          | Group 2 |          | Group 3 |          | Group 4 |          | Group 5  |          |
|-----------|--------|---------|----------|---------|----------|---------|----------|---------|----------|----------|----------|
|           |        | Active  | Inactive | Active  | Inactive | Active  | Inactive | Active  | Inactive | Active   | Inactive |
| SISA      | Core   | 4       | 86       | 4       | 86       | 3       | 87       | 7       | 83       | 8        | 82       |
|           | Random | 4       | 86       | 8       | 82       | 2       | 88       | 3       | 87       | 6        | 84       |
|           | Edge   | 3       | 87       | 6       | 84       | 3       | 87       | 6       | 84       | 6        | 84       |
| RecEraser | Core   | 0       | 90       | 10      | 80       | 0       | 90       | 0       | 90       | 0        | 86       |
|           | Random | 0       | 90       | 1       | 89       | 1       | 89       | 0       | 90       | 0        | 90       |
|           | Edge   | 0       | 90       | 6       | 84       | 0       | 90       | 0       | 86       | 1        | 89       |
| UltraRE   | Core   | 0       | 89       | 11      | 78       | 0       | 90       | 6       | 83       | 0        | 90       |
|           | Random | 0       | 90       | 3       | 86       | 3       | 87       | 1       | 89       | 0        | 89       |
|           | Edge   | 0       | 89       | 15      | 75       | 1       | 88       | 2       | 87       | 7        | 83       |
| ML-100K   |        | Group 6 |          | Group 7 |          | Group 8 |          | Group 9 |          | Group 10 |          |
|           |        | Active  | Inactive | Active  | Inactive | Active  | Inactive | Active  | Inactive | Active   | Inactive |
| SISA      | Core   | 1       | 89       | 3       | 86       | 3       | 86       | 6       | 83       | 5        | 84       |
|           | Random | 5       | 85       | 4       | 85       | 1       | 88       | 5       | 84       | 6        | 83       |
|           | Edge   | 8       | 82       | 2       | 87       | 1       | 88       | 7       | 82       | 2        | 87       |
| RecEraser | Core   | 0       | 90       | 0       | 90       | 28      | 62       | 0       | 90       | 6        | 84       |
|           | Random | 6       | 84       | 9       | 81       | 0       | 90       | 27      | 63       | 0        | 86       |
|           | Edge   | 0       | 90       | 9       | 81       | 0       | 90       | 27      | 63       | 1        | 89       |
| UltraRE   | Core   | 7       | 83       | 10      | 80       | 1       | 89       | 0       | 89       | 9        | 81       |
|           | Random | 3       | 87       | 1       | 88       | 0       | 89       | 18      | 72       | 15       | 75       |
|           | Edge   | 0       | 90       | 1       | 89       | 0       | 90       | 7       | 82       | 11       | 79       |

Table 7: Results of user distribution (active vs. inactive) in each shard on dataset ML-1M. The unlearning data ratio is set to 5%.

| ML-1M     |        | Group 1 |          | Group 2 |          | Group 3 |          | Group 4 |          | Group 5  |          |
|-----------|--------|---------|----------|---------|----------|---------|----------|---------|----------|----------|----------|
|           |        | Active  | Inactive | Active  | Inactive | Active  | Inactive | Active  | Inactive | Active   | Inactive |
| SISA      | Core   | 28      | 546      | 31      | 543      | 26      | 548      | 30      | 544      | 32       | 542      |
|           | Random | 25      | 549      | 34      | 540      | 30      | 544      | 23      | 551      | 35       | 539      |
|           | Edge   | 36      | 538      | 20      | 554      | 24      | 550      | 32      | 542      | 27       | 547      |
| RecEraser | Core   | 44      | 530      | 52      | 522      | 0       | 572      | 20      | 554      | 5        | 569      |
|           | Random | 2       | 570      | 79      | 495      | 44      | 530      | 40      | 534      | 5        | 569      |
|           | Edge   | 10      | 564      | 41      | 533      | 74      | 500      | 31      | 543      | 0        | 574      |
| UltraRE   | Core   | 0       | 573      | 5       | 569      | 11      | 563      | 12      | 562      | 33       | 541      |
|           | Random | 44      | 530      | 6       | 567      | 7       | 567      | 5       | 569      | 13       | 561      |
|           | Edge   | 8       | 566      | 9       | 564      | 11      | 563      | 4       | 569      | 23       | 550      |
| ML-1M     |        | group6  |          | Group 7 |          | Group 8 |          | Group 9 |          | Group 10 |          |
|           |        | Active  | Inactive | Active  | Inactive | Active  | Inactive | Active  | Inactive | Active   | Inactive |
| SISA      | Core   | 23      | 551      | 25      | 549      | 33      | 541      | 28      | 545      | 30       | 543      |
|           | Random | 28      | 546      | 38      | 536      | 22      | 552      | 30      | 543      | 21       | 552      |
|           | Edge   | 27      | 547      | 39      | 535      | 33      | 541      | 26      | 547      | 22       | 551      |
| RecEraser | Core   | 64      | 510      | 1       | 573      | 38      | 536      | 35      | 539      | 27       | 547      |
|           | Random | 32      | 542      | 1       | 573      | 61      | 513      | 2       | 572      | 20       | 554      |
|           | Edge   | 24      | 550      | 2       | 572      | 91      | 483      | 4       | 568      | 9        | 565      |
| UltraRE   | Core   | 44      | 530      | 27      | 547      | 18      | 556      | 32      | 541      | 104      | 470      |
|           | Random | 3       | 571      | 0       | 574      | 14      | 559      | 7       | 567      | 187      | 387      |
|           | Edge   | 0       | 575      | 49      | 525      | 26      | 548      | 155     | 419      | 1        | 573      |



Table 8: Results of user distribution (active vs inactive) in each shard on dataset ADM. The unlearning data ratio is set to 5%.

| ADM       |        | Group 1 |          | Group 2 |          | Group 3 |          | Group 4 |          | Group 5  |          |
|-----------|--------|---------|----------|---------|----------|---------|----------|---------|----------|----------|----------|
|           |        | Active  | Inactive | Active  | Inactive | Active  | Inactive | Active  | Inactive | Active   | Inactive |
| SISA      | Core   | 96      | 2078     | 113     | 2061     | 126     | 2048     | 117     | 2057     | 106      | 2068     |
|           | Random | 108     | 2066     | 112     | 2062     | 95      | 2079     | 110     | 2064     | 84       | 2090     |
|           | Edge   | 112     | 2062     | 105     | 2069     | 100     | 2074     | 120     | 2054     | 106      | 2068     |
| RecEraser | Core   | 429     | 1745     | 0       | 2174     | 8       | 2166     | 0       | 2174     | 0        | 2169     |
|           | Random | 0       | 2169     | 0       | 2174     | 453     | 1721     | 159     | 2015     | 84       | 2090     |
|           | Edge   | 149     | 2025     | 84      | 2090     | 379     | 1795     | 7       | 2167     | 0        | 2169     |
| UltraRE   | Core   | 91      | 2083     | 160     | 2013     | 65      | 2108     | 65      | 2109     | 88       | 2086     |
|           | Random | 41      | 2132     | 80      | 2094     | 361     | 1813     | 81      | 2093     | 56       | 2117     |
|           | Edge   | 82      | 2092     | 11      | 2162     | 201     | 1972     | 53      | 2120     | 330      | 1844     |
| ADM       |        | Group 6 |          | Group 7 |          | Group 8 |          | Group 9 |          | Group 10 |          |
|           |        | Active  | Inactive | Active  | Inactive | Active  | Inactive | Active  | Inactive | Active   | Inactive |
| SISA      | Core   | 98      | 2075     | 112     | 2061     | 99      | 2074     | 115     | 2058     | 104      | 2069     |
|           | Random | 119     | 2054     | 114     | 2059     | 135     | 2038     | 116     | 2057     | 93       | 2080     |
|           | Edge   | 109     | 2064     | 106     | 2067     | 111     | 2062     | 102     | 2071     | 115      | 2058     |
| RecEraser | Core   | 1       | 2173     | 97      | 2077     | 388     | 1786     | 121     | 2053     | 42       | 2132     |
|           | Random | 9       | 2165     | 0       | 2174     | 0       | 2174     | 4       | 2170     | 377      | 1797     |
|           | Edge   | 456     | 1718     | 0       | 2174     | 0       | 2174     | 10      | 2164     | 1        | 2173     |
| UltraRE   | Core   | 65      | 2109     | 173     | 2001     | 147     | 2026     | 123     | 2051     | 109      | 2063     |
|           | Random | 200     | 1973     | 50      | 2124     | 137     | 2036     | 48      | 2125     | 32       | 2142     |
|           | Edge   | 82      | 2091     | 58      | 2116     | 121     | 2052     | 55      | 2119     | 93       | 2081     |

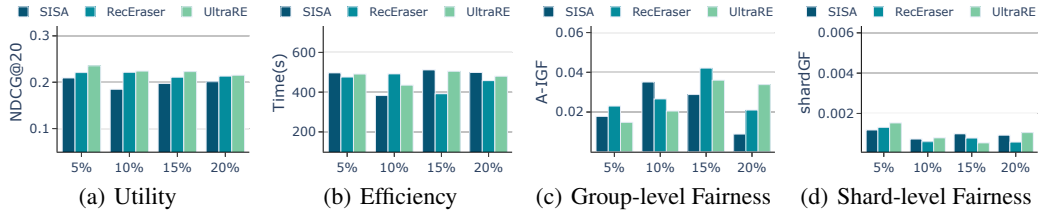

Figure 8: Effect of unlearning ratio in terms of multiple aspects, i.e., recommendation utility ( $\uparrow$ ), unlearning efficiency ( $\downarrow$ ), group-level fairness (approaching Retrain), and shard-level fairness ( $\downarrow$ ).
